# Supplementary material for: Synthesis of porous Ni@rGO nanocomposite and its synergetic effect on hydrogen sorption properties of MgH2
Source: Royal Society of Chemistry journal article supplement (doi:10.1039/c2jm34730j), 2012-01-01
Supplement: c2jm34730j.pdf [file c2jm34730j.pdf]

## Synthesis of porous Ni@rGO nanocomposite and its synergetic effect on hydrogen sorption properties of MgH<sub>2</sub>

Guang Liu, Yijing Wang,\* Fangyuan Qiu, Li Li, Lifang Jiao and Huatang Yuan

Institute of New Energy Material Chemistry, Key Laboratory of Advanced Energy Materials  
Chemistry (MOE), Tianjin Key Lab on Metal and Molecule-based Material Chemistry, Nankai  
University, Tianjin 300071, P. R. China

\* Corresponding author. E-mail: wangyj@nankai.edu.cn

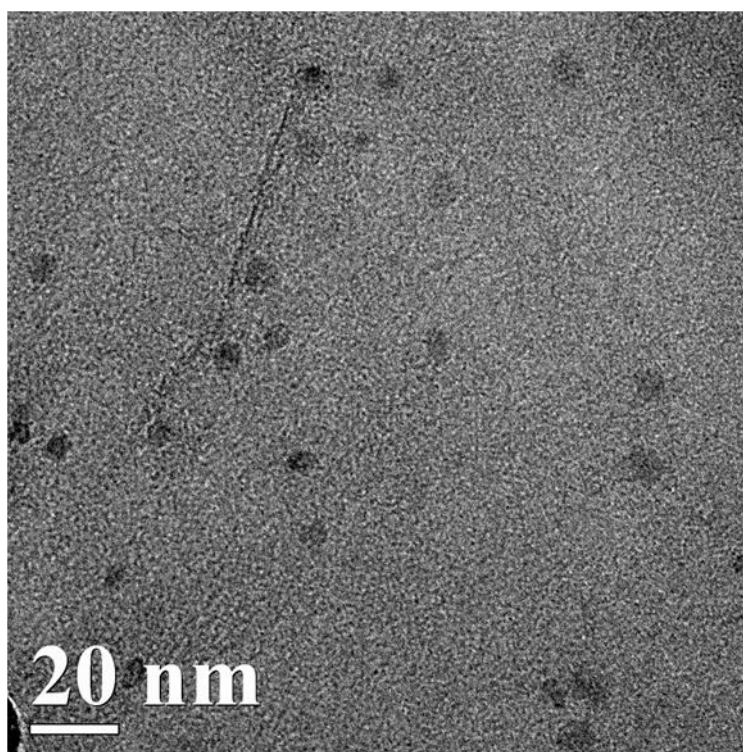

Fig. S1 TEM image of Ni@rGO contains even smaller Ni particles.

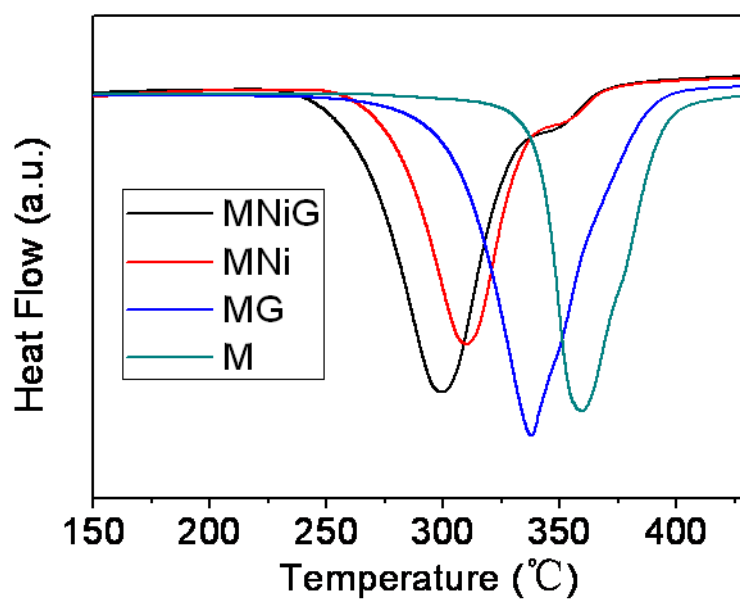

Fig. S2 The representative DSC curves of the different samples. The heating rate was 5 °C/min.

Table S1 Decomposition peak temperature of different samples determined by DSC

| Heating rate (°C) | DSC (°C) for different samples |       |       |                  |
|-------------------|--------------------------------|-------|-------|------------------|
|                   | MNiG                           | MNi   | MG    | MgH <sub>2</sub> |
| 2                 | 283.3                          | 286.7 | 323   | 340.7            |
| 5                 | 299.8                          | 309.6 | 338.3 | 359.3            |
| 10                | 316.8                          | 326.2 | 350.5 | 374.5            |
| 20                | 337.3                          | 340.1 | 365.6 | 386.3            |
